# Supplementary material
Source: PubMed Central journal article supplement (PMC2427297)
Supplement: mmc1.pdf [file mmc1.pdf]

## **Supplemental Data**

### **Loss of Nephrocystin-3 Function Can Cause Embryonic**

### **Lethality, Meckel-Gruber-like Syndrome,**

### **Situs Inversus, and Renal-Hepatic-Pancreatic Dysplasia**

**Carsten Bergmann, Manfred Fliegau, Nadina Ortiz Brüche, Valeska Frank, Heike Olbrich, Jan Kirschner, Bernhard Schermer, Ingolf Schmedding, Andreas Kispert, Bettina Kränzlin, Gudrun Nürnberg, Christian Becker, Tiemo Grimm, Gundula Girschick, Sally A Lynch, Peter Kelehan, Jan Senderek, Thomas J Neuhaus, Thomas Stallmach, Hanswalter Zentgraf, Peter Nürnberg, Norbert Gretz, Cecilia Lo, Soeren Lienkamp, Tobias Schäfer, Gerd Walz, Thomas Benzing, Klaus Zerres, and Heymut Omran**

**A**

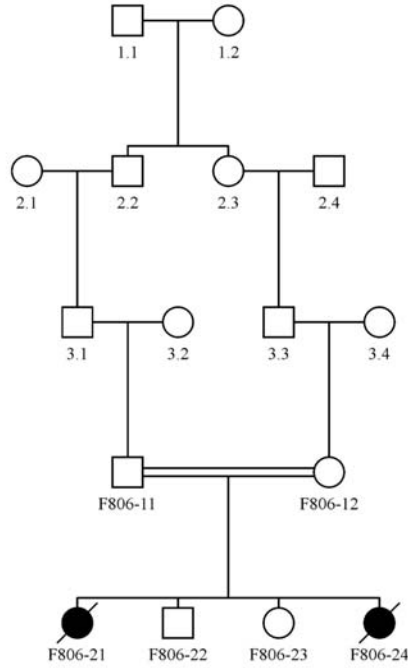

**B**

|               |        |   |   |   |   |   |   |
|---------------|--------|---|---|---|---|---|---|
| SNP_A-1650397 | 132.67 | 2 | 2 | 2 | 2 | 2 | 2 |
| SNP_A-1660502 | 132.76 | 1 | 1 | 1 | 1 | 1 | 1 |
| SNP_A-1662717 | 133.02 | 1 | 2 | 2 | 1 | 2 | 1 |
| SNP_A-1727336 | 133.14 | 2 | 2 | 1 | 2 | 1 | 2 |
| SNP_A-1727456 | 133.14 | 1 | 1 | 2 | 1 | 2 | 1 |
| SNP_A-1727588 | 133.14 | 2 | 2 | 1 | 2 | 1 | 2 |
| SNP_A-1729589 | 133.15 | 2 | 2 | 1 | 2 | 1 | 2 |
| SNP_A-1651247 | 133.15 | 1 | 1 | 2 | 1 | 2 | 1 |
| SNP_A-1657214 | 133.41 | 1 | 1 | 2 | 1 | 2 | 1 |
| SNP_A-1711751 | 133.50 | 2 | 2 | 2 | 2 | 2 | 2 |
| SNP_A-1642694 | 133.57 | 2 | 2 | 2 | 2 | 2 | 2 |
| SNP_A-1644047 | 133.57 | 1 | 1 | 1 | 1 | 1 | 1 |
| SNP_A-1644389 | 133.57 | 2 | 2 | 2 | 2 | 2 | 2 |
| SNP_A-1667179 | 133.72 | 1 | 1 | 1 | 1 | 1 | 1 |
| SNP_A-1667291 | 133.72 | 1 | 1 | 1 | 1 | 1 | 1 |
| SNP_A-1667403 | 133.72 | 2 | 2 | 2 | 2 | 2 | 2 |
| SNP_A-1670935 | 133.77 | 2 | 2 | 2 | 2 | 2 | 2 |
| SNP_A-1727524 | 133.93 | 2 | 2 | 1 | 2 | 1 | 2 |
| SNP_A-1656120 | 133.96 | 2 | 2 | 2 | 2 | 2 | 2 |
| SNP_A-1694719 | 134.01 | 1 | 1 | 1 | 1 | 1 | 1 |
| SNP_A-1668367 | 134.02 | 1 | 1 | 2 | 1 | 2 | 1 |
| SNP_A-1710272 | 134.07 | 1 | 1 | 1 | 1 | 1 | 1 |
| SNP_A-1710360 | 134.07 | 1 | 1 | 1 | 1 | 1 | 1 |
| SNP_A-1715534 | 134.15 | 1 | 1 | 1 | 1 | 1 | 1 |
| SNP_A-1714696 | 135.26 | 2 | 2 | 1 | 2 | 1 | 2 |
| SNP_A-1656214 | 135.45 | 2 | 2 | 2 | 2 | 2 | 2 |
| SNP_A-1656302 | 135.45 | 2 | 2 | 1 | 2 | 1 | 2 |
| SNP_A-1703244 | 135.52 | 1 | 1 | 2 | 1 | 2 | 1 |
| SNP_A-1703396 | 135.53 | 1 | 1 | 2 | 1 | 2 | 1 |
| SNP_A-1705246 | 135.54 | 1 | 1 | 2 | 1 | 2 | 1 |
| SNP_A-1750546 | 135.66 | 1 | 1 | 2 | 1 | 2 | 1 |
| SNP_A-1754199 | 135.70 | 2 | 2 | 1 | 2 | 1 | 2 |
| SNP_A-1645407 | 136.73 | 1 | 1 | 1 | 1 | 1 | 1 |
| SNP_A-1660734 | 136.83 | 2 | 2 | 2 | 2 | 2 | 2 |
| SNP_A-1691983 | 137.34 | 1 | 1 | 1 | 1 | 1 | 1 |
| SNP_A-1650243 | 137.60 | 1 | 1 | 1 | 1 | 1 | 1 |
| SNP_A-1653823 | 137.62 | 1 | 1 | 1 | 1 | 1 | 1 |
| SNP_A-1653937 | 137.62 | 1 | 1 | 1 | 1 | 1 | 1 |
| SNP_A-1655908 | 137.65 | 1 | 1 | 1 | 1 | 1 | 1 |
| SNP_A-1709824 | 137.74 | 1 | 1 | 1 | 1 | 1 | 1 |
| SNP_A-1750696 | 138.05 | 2 | 2 | 2 | 2 | 2 | 2 |
| SNP_A-1750794 | 138.05 | 2 | 2 | 2 | 2 | 2 | 2 |
| SNP_A-1681971 | 138.11 | 2 | 2 | 2 | 2 | 2 | 2 |
| SNP_A-1682105 | 138.11 | 1 | 1 | 1 | 1 | 1 | 1 |
| SNP_A-1683659 | 138.11 | 1 | 1 | 1 | 1 | 1 | 1 |
| SNP_A-1690987 | 138.17 | 1 | 1 | 1 | 1 | 1 | 1 |
| SNP_A-1694096 | 138.18 | 2 | 2 | 2 | 2 | 2 | 2 |
| SNP_A-1694200 | 138.18 | 2 | 2 | 2 | 2 | 2 | 2 |
| SNP_A-1750354 | 138.31 | 1 | 1 | 1 | 1 | 1 | 1 |
| SNP_A-1736874 | 143.83 | 2 | 2 | 2 | 2 | 2 | 2 |
| SNP_A-1679653 | 143.90 | 1 | 1 | 2 | 1 | 2 | 1 |
| SNP_A-1681723 | 143.91 | 1 | 1 | 1 | 1 | 1 | 1 |
| SNP_A-1659940 | 143.97 | 2 | 2 | 2 | 2 | 2 | 2 |
| SNP_A-1660214 | 143.97 | 1 | 1 | 2 | 1 | 2 | 1 |
| SNP_A-1661529 | 143.98 | 2 | 2 | 2 | 2 | 2 | 2 |
| SNP_A-1661683 | 143.98 | 1 | 1 | 1 | 1 | 1 | 1 |
| SNP_A-1740232 | 144.03 | 2 | 2 | 2 | 2 | 2 | 2 |
| SNP_A-1750634 | 144.03 | 1 | 1 | 1 | 1 | 1 | 1 |
| SNP_A-1750746 | 144.03 | 1 | 1 | 1 | 1 | 1 | 1 |
| SNP_A-1747940 | 144.04 | 2 | 2 | 2 | 2 | 2 | 2 |
| SNP_A-1726819 | 144.11 | 1 | 1 | 1 | 1 | 1 | 1 |
| SNP_A-1732112 | 144.16 | 1 | 1 | 1 | 1 | 1 | 1 |
| SNP_A-1671707 | 144.22 | 1 | 1 | 1 | 1 | 1 | 1 |
| SNP_A-1671827 | 144.22 | 2 | 2 | 1 | 2 | 1 | 2 |
| SNP_A-1660374 | 144.28 | 1 | 1 | 1 | 1 | 1 | 1 |
| SNP_A-1660464 | 144.28 | 1 | 1 | 1 | 1 | 1 | 1 |
| SNP_A-1665259 | 144.28 | 2 | 2 | 2 | 2 | 2 | 2 |
| SNP_A-1665349 | 144.28 | 1 | 1 | 1 | 1 | 1 | 1 |
| SNP_A-1668852 | 144.28 | 1 | 1 | 1 | 1 | 1 | 1 |
| SNP_A-1669450 | 144.29 | 2 | 2 | 2 | 2 | 2 | 2 |
| SNP_A-1709120 | 144.29 | 1 | 1 | 1 | 1 | 1 | 1 |
| SNP_A-1739472 | 144.33 | 2 | 2 | 2 | 2 | 2 | 2 |
| SNP_A-1745997 | 144.34 | 1 | 1 | 1 | 1 | 1 | 1 |
| SNP_A-1747784 | 144.35 | 2 | 2 | 2 | 2 | 2 | 2 |
| SNP_A-1751466 | 144.36 | 1 | 1 | 1 | 1 | 1 | 1 |
| SNP_A-1751596 | 144.36 | 1 | 1 | 2 | 1 | 2 | 1 |
| SNP_A-1684135 | 144.40 | 1 | 1 | 1 | 1 | 1 | 1 |
| SNP_A-1688101 | 144.42 | 1 | 2 | 2 | 1 | 2 | 1 |
| SNP_A-1735862 | 144.51 | 1 | 1 | 1 | 1 | 1 | 1 |
| SNP_A-1664005 | 144.67 | 2 | 1 | 1 | 2 | 1 | 2 |

**Figure S1. Pedigree and Linkage Analysis in Family F806**

(A) Pedigree of consanguineous multiplex family F806.

(B) GENEHUNTER haplotypes of the four children of family F806 for the locus on chromosome 3q21.2-q22.3 obtained by genome-wide SNP mapping with the 50K Affymetrix SNP array. This locus was subsequently confirmed by microsatellite marker analysis and refined to an 11.6 Mb interval flanked by rs905455 and D3S1216.

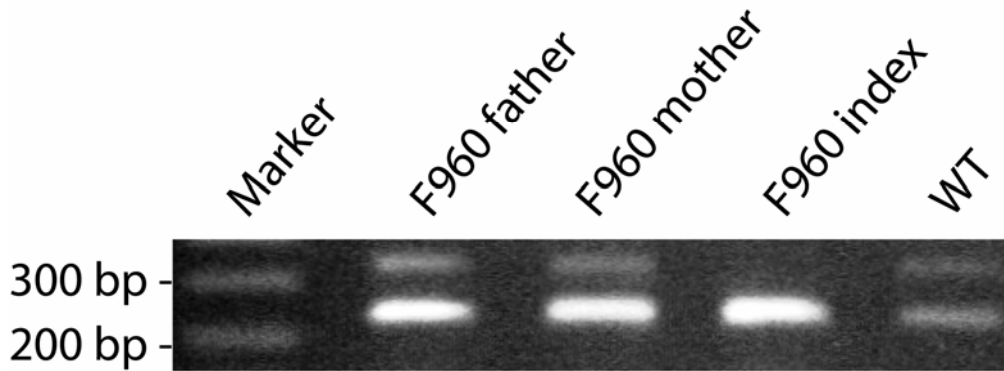

**Figure S2. Homozygous Splice Mutation in Family F960**

Characterization of the donor splice mutation c.1985+5G → A in family 960 on RNA level with primers in exons 11 and 14. RT-PCR products from parental lymphocytes were compared with control lymphocytes. Sequencing demonstrated that the upper band that is present in the patient's parents and control but not in the patient corresponded to the wild-type (WT) complementary DNA (cDNA) sequence comprising exons 11–14. The lower band corresponded to skipping of exon 13 and is predicted to result in an out-of-frame transcript and premature termination of translation, confirming the pathogenicity of this homozygous mutation in the probanda.

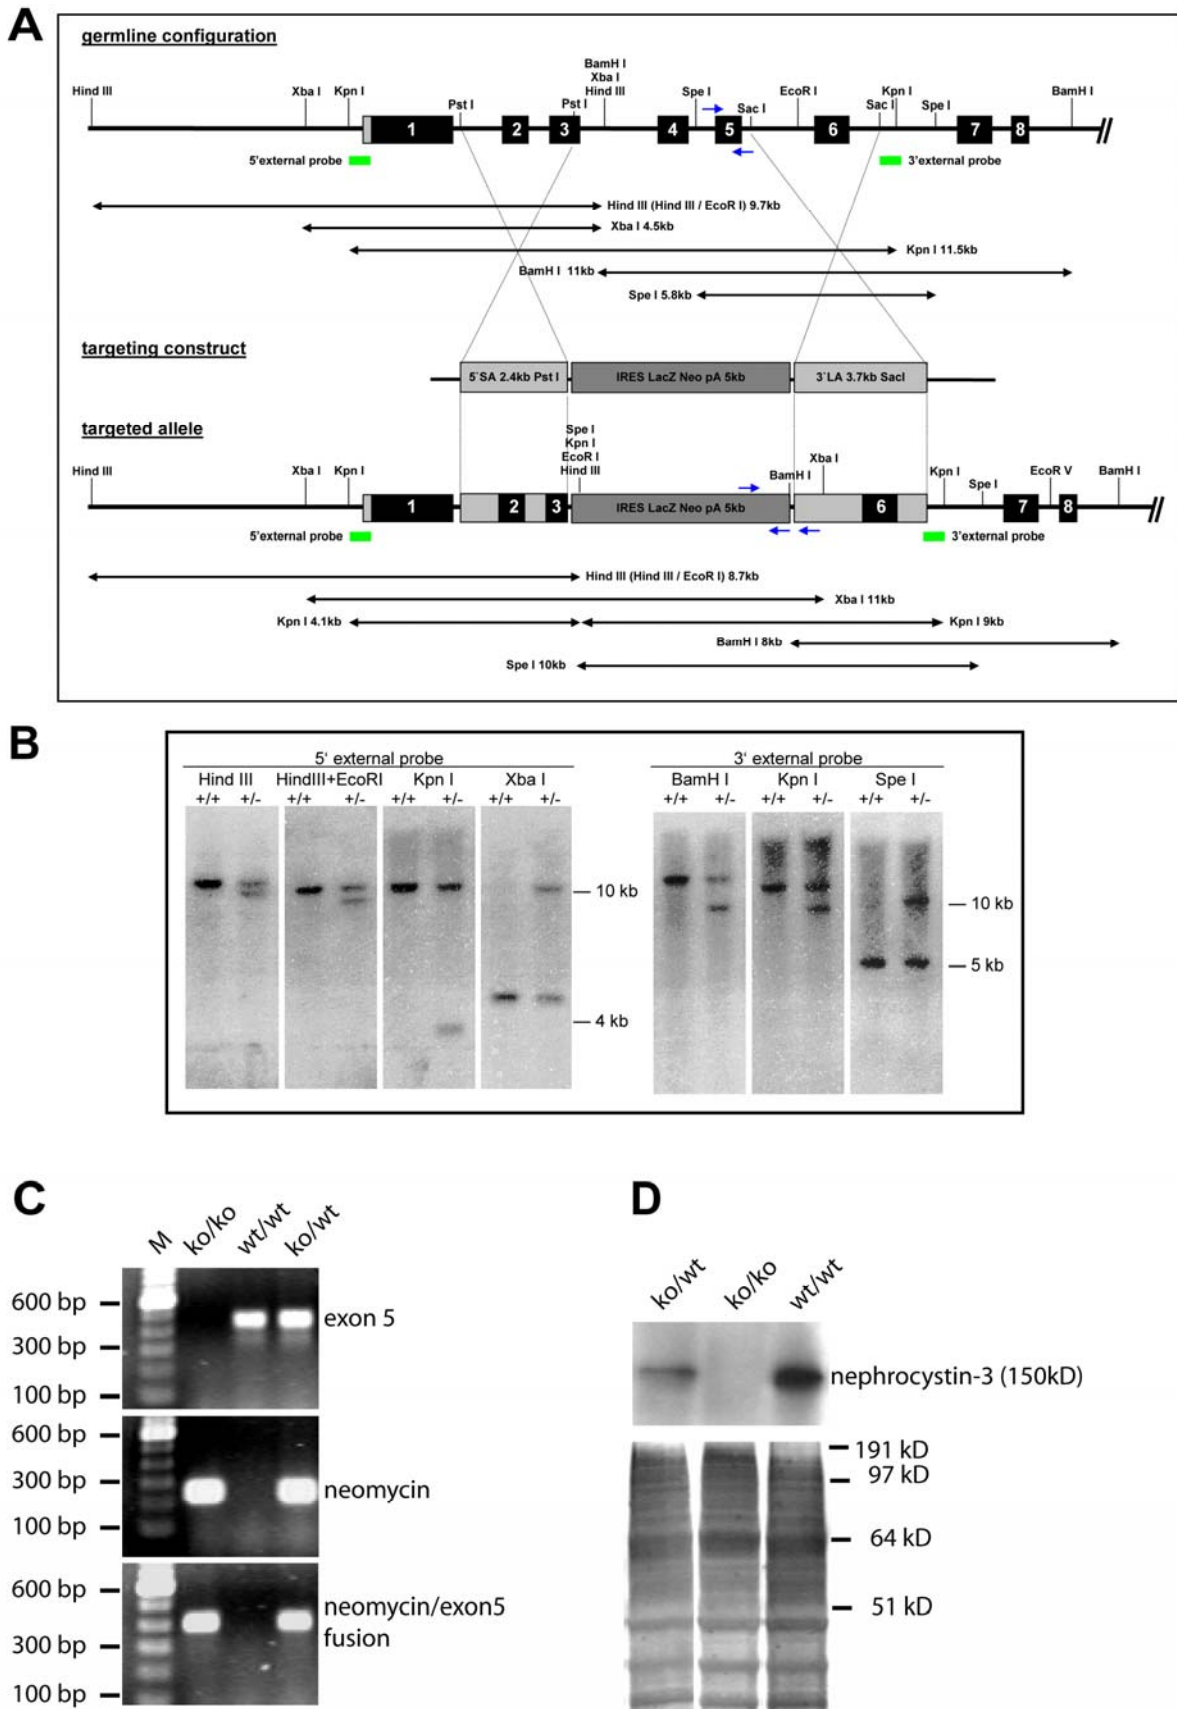

**Figure S3. Generation of *Nphp3* ko Mice by Gene Targeting**

(A) Schematic diagram of the *Nphp3* locus (Exons 1–8 are shown only), the targeting vector, and the targeted allele. Only the relevant restriction enzyme sites are indicated. The expected band sizes that correspond to the wild-type and mutated genotypes, respectively, are indicated by vertical arrows.

(B) G418-resistant embryonic stem (ES) cell clones with a correctly targeted *Nphp3* locus were identified by Southern-blot analysis of restriction-enzyme-digested ES cell genomic DNA as indicated. The correct structure of the targeted locus on both sides was confirmed with a 5' external and a 3' external probe, which hybridized to fragments of the predicted sizes for the wild-type allele and a correctly targeted allele. The existence of a single integration site at the targeted locus was verified with an internal probe derived from the resistance cassette (data not shown). A homologously targeted ES cell clone was injected into C57BL/6 blastocysts, and chimeric mice were bred to C57BL/6 mice, yielding mice heterozygous for the mutant allele. Heterozygous mice were backcrossed to C57BL/6 mice for six generations and interbred so that embryos homozygous for the mutant allele could be obtained. All animals were kept under specific pathogen-free conditions.

(C) Mice and embryos were genotyped from tail DNA and yolk-sack DNA, respectively, by PCR with primers specific for exon 5, the neomycin gene, and the neomycin/intron 5 fusion region (primer locations are indicated in (A) by short blue arrows). Size markers are shown on the left side.

(D) The generation of a null allele was confirmed by western blot with mouse monoclonal antibodies raised against a 253 amino acid C-terminal fragment derived from the highly homologous human nephrocystin-3. Genotyped embryos (E12.5) were homogenized in RIPA-buffer, and proteins were separated and blotted with a NuPAGE gel system (Invitrogen, Karlsruhe, Germany). The polyvinylidene fluoride (PVDF) membrane was processed for enhanced chemiluminescence (ECL) detection (both GE Healthcare, Freiburg, Germany) with horseradish peroxidase (HRP)-conjugated secondary antibodies (SantaCruz Biotechnology, Heidelberg, Germany). Nephrocystin-3 is decreased in the heterozygous embryo, absent in the homozygous embryo, and readily detectable in the wild-type embryo (top). Equal loading and protein integrity was confirmed by silverstaining of aliquots run on a separate gel (bottom). Molecular weight markers are indicated on the right.

**Table S1. Primer Pairs Used for *NPHP3* Mutation Analysis**

| Exon  | Size (bp) | Primer Sequences            |                             |
|-------|-----------|-----------------------------|-----------------------------|
|       |           | Forward (5'-3')             | Reward (5'-3')              |
| 1     | 496       | CACTAGGTAGTAGCGGCAACG       | AAGCCGCTTGTTTTGGAG          |
| 2     | 400       | GGCAACATGAAGTTCCTGATAA      | ACTTTCCTGAATCCTACATGACTT    |
| 3     | 400       | GAAATCGAGGACCAAATGAA        | CTATTTGCAACAGTAGTTAAAGCAA   |
| 4     | 400       | GTCGATGGCAAAGTATTTTCA       | TTTCATGCTTTGCTAATGGTATT     |
| 5     | 370       | GATTCCATTCTATGATGCCTGTT     | CCAAGACGCTTCCTGTCTT         |
| 6     | 392       | TGTTTTAAAGCGTGCTTTTTATT     | GTTGTAGAATTTATTGAATTTTCATGG |
| 7     | 393       | ACTTTTCTGGCCACTTGTC         | CCAGCCACACTGGTTTCTCT        |
| 8     | 393       | ATCCCTTGTTGACCTTGGA         | CAAGCAAGTGGTTTTCTCTGG       |
| 9     | 398       | GTAGGTGAAGCCACTTTGG         | CATGGATAATCAAGCCATGAGA      |
| 10    | 299       | TCATTTTCTCACACAGCTTTTCTC    | GGCAGGCATGCAATACATTT        |
| 11/12 | 698       | GGCAACATTTGATGTTTACTGC      | GCCTGCTCTAGCTATTACTGAATTT   |
| 13    | 357       | CACCCAAAATAAGATTTTTATCC     | CACTTCTCCCCATCCTCACT        |
| 14/15 | 814       | AAGCAGTATAAAGTGTTAATTCCTGTG | GTTTTGCAGGGTGAGAAAGG        |
| 16    | 375       | TTGAATTTGTTATTGGTTGCAGT     | TCCTGCATATGCCTGAAACA        |
| 17    | 364       | TTGGTAAAAAGAAATAGCCTTAAAAGA | GGCAGAAATAATCTTGCCACT       |
| 18/19 | 978       | TTTTTGCAAATCTCTTGTTAGATG    | AAATTGTCTCAAGATTTCTCCTACACT |
| 20/21 | 847       | TGAGTGGTCTGAGTCTTACCTCA     | CACAGTGATAAAACAAAGCTTACCC   |
| 22/23 | 1190      | GCCCCAAAAGACTTTACACTATGAA   | CATGAAATTTTGC GTGGTTTT      |
| 24    | 500       | GAGATAGGGGTGGGGAAGAG        | ACCTGTCCCTCATAAAGACAAA      |
| 25/26 | 1000      | TTTTCCCTCAAAATTACCCTTT      | TGTGCTATTCTAAGACAAAGCTACTTC |
| 27    | 460       | AGAGGGGAAATGGGCAAATA        | CACAATCCAACCTTAATGTAATCCA   |

GenBank NM\_153240. Annealing temperature for all PCR fragments was 58°C.
